# Supplementary material for: Cataloging of Cd Allocation in Late Rice Cultivars Grown in Polluted Gleysol: Implications for Selection of Cultivars with Minimal Risk to Human Health
Source: MDPI journal article supplement (doi:10.3390/ijerph17103632), 2020-05-21
Supplement: s1 [file s1]

Table S1. Cultivars information tested for the Cd uptake, accumulation and health risk assessment

| Cultivar no | Cultivar name       | Cultivar Type                 | Cultivar no | Cultivar name      | Cultivar Type                   |
|-------------|---------------------|-------------------------------|-------------|--------------------|---------------------------------|
| LR-1        | shenliangyou5814    | Indica Two-line Hybrid Rice   | LR-15       | wuyou103           | Indica Three-line Hybrid Rice   |
| LR-2        | liangyou336         | Indica Two-line Hybrid Rice   | LR-16       | yueyou9133         | Indica Three-line Hybrid Rice   |
| LR-3        | taiyou398           | Indica Three-line Hybrid Rice | LR-17       | wushanshimiao      | Conventional Rice               |
| LR-4        | wuyouhuazhan        | Indica Three-line Hybrid Rice | LR-18       | Hyou158            | Indica Two-line Hybrid Rice     |
| LR-5        | taiyou98            | Indica Three-line Hybrid Rice | LR-19       | shenyou9566        | Indica Two-line Hybrid Rice     |
| LR-6        | zaofengyouhuazhan   | Indica Three-line Hybrid Rice | LR-20       | xinliangyou611     | Indica Two-line Hybrid Rice     |
| LR-7        | wuyou61             | Indica Three-line Hybrid Rice | LR-21       | liangyou6026       | Indica Two-line Hybrid Rice     |
| LR-8        | jiyouyazhan         | Indica Three-line Hybrid Rice | LR-22       | fengliangyouwansan | Indica Two-line Hybrid Rice     |
| LR-9        | rongyouhuazhan      | Indica Three-line Hybrid Rice | LR-23       | zhunliangyou893    | Indica Two-line Hybrid Rice     |
| LR-10       | tianyouyazhan       | Indica Three-line Hybrid Rice | LR-24       | SM727              | Japonica Conventional Rice      |
| LR-11       | meixiangxinzhan     | Indica Conventional Rice      | LR-25       | xidaosanhao        | Japonica Conventional Rice      |
| LR-12       | Hyou518             | Indica Three-line Hybrid Rice | LR-26       | SM728              | Japonica Conventional Rice      |
| LR-13       | wuyou308            | Indica Three-line Hybrid Rice | LR-27       | yonyoujiuhao       | Japonica Three-line Hybrid Rice |
| LR-14       | rongxiangyouhuazhan | Indica Three-line Hybrid Rice |             |                    |                                 |
